# Supplementary material
Source: PubMed Central journal article supplement (PMC5705179)

1 **Supplemental Table 1: Systolic and diastolic blood pressures prior to and following**  
 2 **treatment**

| Time            | Systolic Blood Pressure, mmHg |           |         | Diastolic Blood Pressure, mmHg |           |         |
|-----------------|-------------------------------|-----------|---------|--------------------------------|-----------|---------|
|                 | Placebo                       | Icatibant | P-value | Placebo                        | Icatibant | P-value |
|                 | N=18                          | N=12      |         | N=18                           | N=12      |         |
| <b>Baseline</b> | 139±21                        | 137±11    | 0.94    | 76±15                          | 82±11     | 0.32    |
| <b>1 hour</b>   | 133±17                        | 134±13    | 0.58    | 75±13                          | 78±13     | 0.31    |
| <b>2 hours</b>  | 135±14                        | 134±16    | 0.79    | 75±15                          | 75±15     | 1.00    |
| <b>3 hours</b>  | 129±14                        | 134±24    | 0.63    | 73±12                          | 75±11     | 0.92    |
| <b>4 hours</b>  | 137±18                        | 135±18    | 0.98    | 74±15                          | 74±11     | 0.46    |
| <b>6 hours</b>  | 131±18                        | 139±19    | 0.45    | 70±10                          | 79±14     | 0.09    |
| <b>8 hours</b>  | 136±25                        | 125±25    | 0.40    | 78±18                          | 68±10     | 0.18    |
| <b>16 hours</b> | 139±26                        | 126±22    | 0.30    | 74±14                          | 80±15     | 0.36    |
| <b>24 hours</b> | 135±19                        | 124±16    | 0.23    | 73±7                           | 66±8      | 0.14    |
| <b>48 hours</b> | 135±11                        | 126±14    | 0.33    | 68±8                           | 68±10     | 0.75    |

3

1

## Supplemental Figure 1: Study Flow Diagram

2

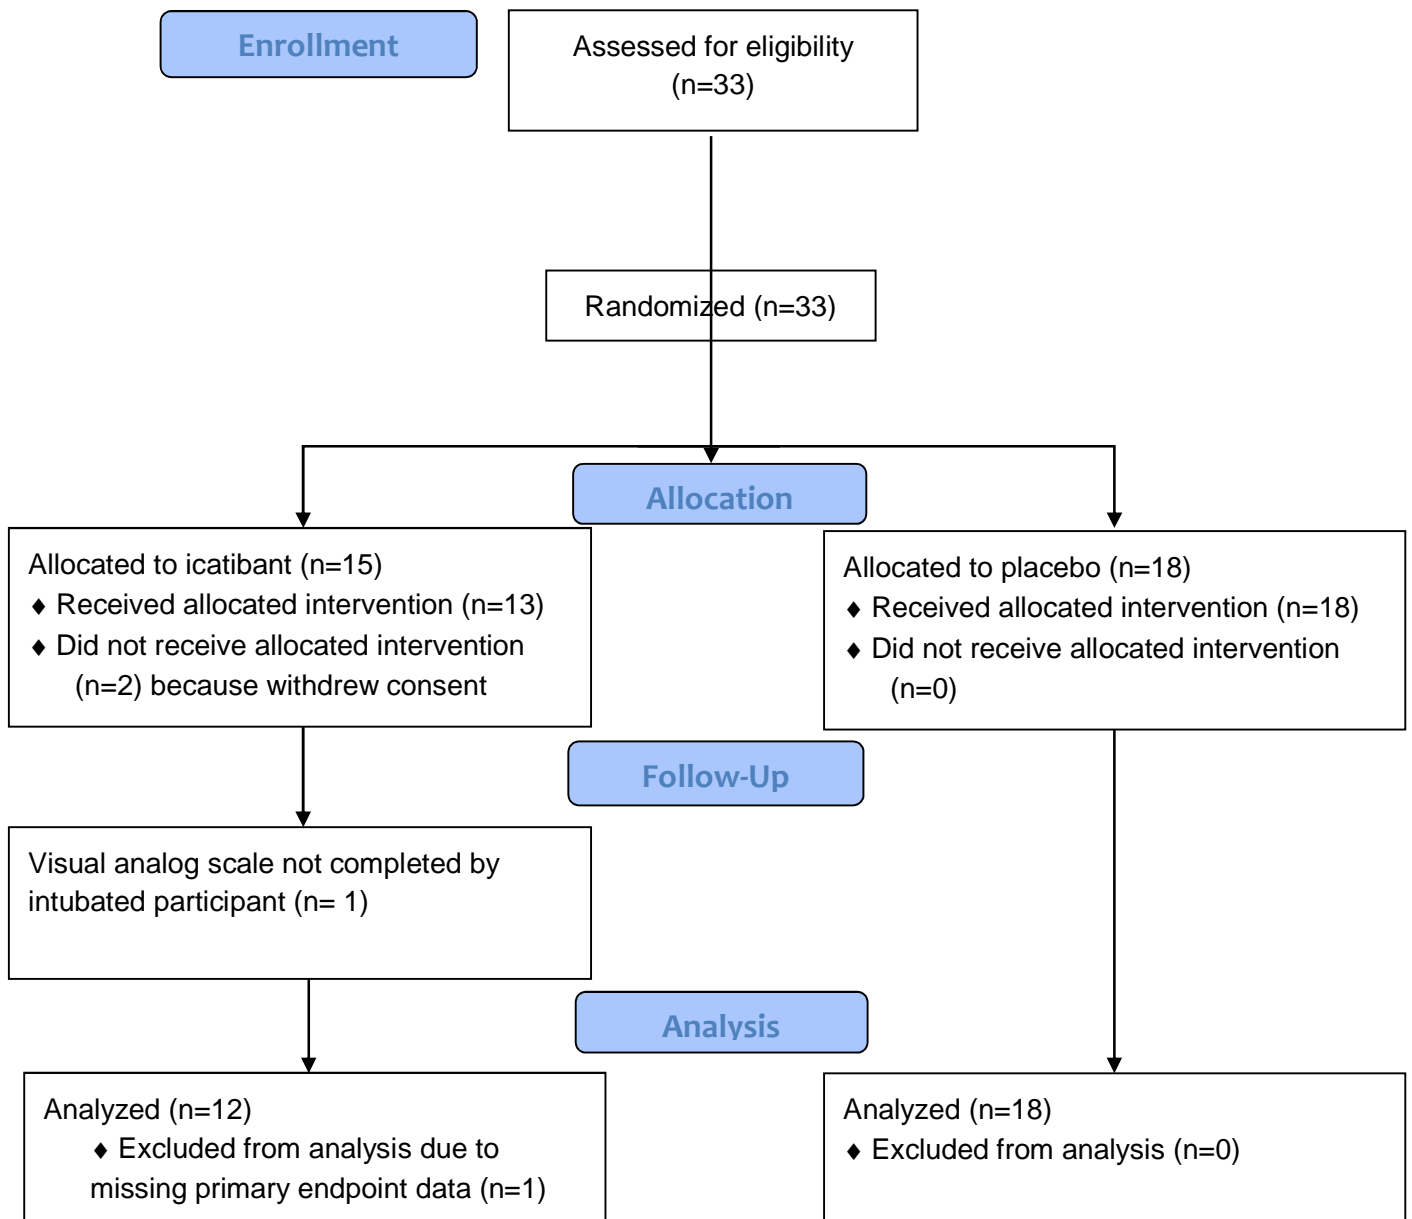

Supplement: NIHMS832987-supplement-supplement_1.pdf [file NIHMS832987-supplement-supplement_1.pdf]
